# Supplementary material for: Genome-Wide Identification and Expression Analysis of SOS Response Genes in Salmonella enterica Serovar Typhimurium
Source: MDPI journal article supplement (doi:10.3390/cells10040943), 2021-04-19
Supplement: s1 [file s1]

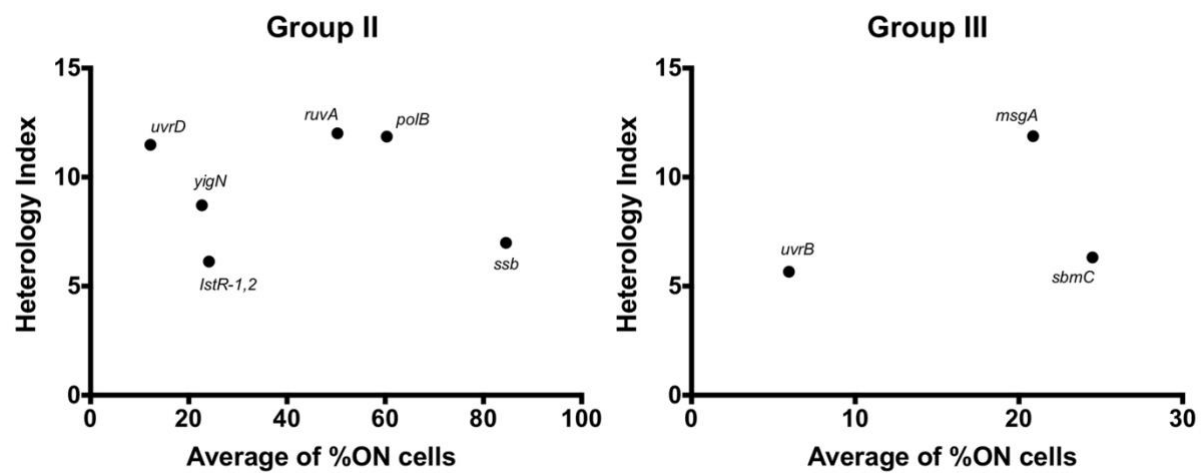

**Figure S5.** Correlation between the HI values of SOS boxes and the sizes of the ON subpopulations of genes classified into groups II and III.
