# Supplementary material for: Genome-Wide Identification and Expression Analysis of SOS Response Genes in Salmonella enterica Serovar Typhimurium
Source: MDPI journal article supplement (doi:10.3390/cells10040943), 2021-04-19
Supplement: s1 [file s1]

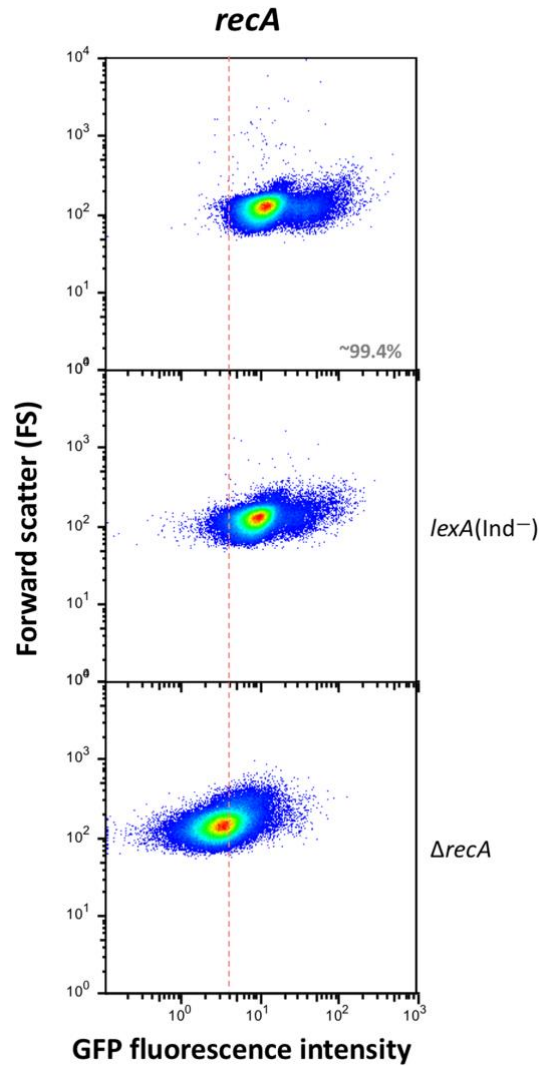

**Figure S4.** Expression pattern of *recA*. Nearly all cells in a non-induced culture express *recA*. A subpopulation of ~5.6% cells presents higher levels of GFP fluorescence, indicating that *recA* is expressed at higher rates in these cells. In a LexA(Ind<sup>-</sup>) background, this subpopulation decreases to ~3.5%, but does not disappear completely, suggesting that LexA is not entirely responsible for the heterogeneity of *recA* expression. In the absence of RecA, the activity of the *recA* promoter decreases to 32% but the expression remains heterogeneous.
