# Supplementary material for: Genome-Wide Identification and Expression Analysis of SOS Response Genes in Salmonella enterica Serovar Typhimurium
Source: MDPI journal article supplement (doi:10.3390/cells10040943), 2021-04-19
Supplement: s1 [file s1]

**Table S1.** SOS response genes identified in *E. coli* and *S. enterica*. Genes highlighted in bold are shared by this study and others.

| Fernandez de Henestrosa et al. 2000 (42) ( <i>E. coli</i> ) | Wade et al. 2005 (9) ( <i>E. coli</i> ) | Erill et al. 2003 (2) ( <i>S. enterica</i> ) | This work ( <i>S. enterica</i> ) |
|-------------------------------------------------------------|-----------------------------------------|----------------------------------------------|----------------------------------|
| <b>dinB</b>                                                 | <b>dinB</b>                             | <b>dinB</b>                                  | <b>dinB (dinP)</b>               |
| <b>dinG</b>                                                 | <b>dinG</b>                             | <b>dinG</b>                                  | <b>dinG</b>                      |
| <b>dinI</b>                                                 | <b>dinI</b>                             | <b>dinI</b>                                  | <b>dinI</b>                      |
| <b>lexA</b>                                                 | <b>lexA</b>                             | <b>lexA</b>                                  | <b>lexA</b>                      |
| <b>polB</b>                                                 | <b>polB</b>                             | <b>polB</b>                                  | <b>polB</b>                      |
| <b>recA</b>                                                 | <b>recA</b>                             | <b>recA</b>                                  | <b>recA</b>                      |
| <b>recN</b>                                                 | <b>recN</b>                             | <b>recN</b>                                  | <b>recN</b>                      |
| <b>sbmC</b>                                                 | <b>sbmC</b>                             | <b>sbmC</b>                                  | <b>sbmC</b>                      |
| <b>ssb</b>                                                  | <b>ssb</b>                              | <b>ssb</b>                                   | <b>Ssb</b>                       |
| <b>sulA</b>                                                 | <b>sulA</b>                             | <b>sulA</b>                                  | <b>sulA</b>                      |
| <b>umuDC</b>                                                | <b>umuDC</b>                            | <b>umuDC</b>                                 | <b>umuDC</b>                     |
| <b>uvrA</b>                                                 | <b>uvrA</b>                             | <b>uvrA</b>                                  | <b>uvrA</b>                      |
| <b>uvrB</b>                                                 | <b>uvrB</b>                             | <b>uvrB</b>                                  | <b>uvrB</b>                      |
| <b>uvrD</b>                                                 | <b>uvrD</b>                             | <b>uvrD</b>                                  | <b>uvrD</b>                      |
| <b>ydjM</b>                                                 | <b>ydjM</b>                             | <b>ydjM</b>                                  | <b>ydjM</b>                      |
| <b>yebG</b>                                                 | <b>yebG</b>                             | <b>yebG</b>                                  | <b>yebG</b>                      |
| <b>yigN</b>                                                 | <b>yigN</b>                             | <b>yigN</b>                                  | <b>yigN</b>                      |
| <b>brnQ</b>                                                 | <b>ydjQ</b>                             | <b>ydjQ</b>                                  | <b>ydjQ</b>                      |
| <b>creA</b>                                                 | <b>cadB</b>                             | <b>msgA</b>                                  | <b>msgA</b>                      |
| <b>dinQ</b>                                                 | <b>clpX</b>                             | <b>STM14_1156</b>                            | <b>STM14_1156</b>                |
| <b>dinS</b>                                                 | <b>dinD</b>                             | <b>STM14_3210</b>                            | <b>STM14_3210</b>                |
| <b>dinJ</b>                                                 | <b>dinQ</b>                             | <b>ftsK</b>                                  | <b>dinJ</b>                      |
| <b>ecpD</b>                                                 | <b>fadE</b>                             | <b>ftsY</b>                                  | <b>corE</b>                      |
| <b>ftsK</b>                                                 | <b>ftsK</b>                             | <b>mfd</b>                                   | <b>cysP</b>                      |
| <b>hofQ</b>                                                 | <b>hokE</b>                             | <b>minC</b>                                  | <b>deoD</b>                      |
| <b>hokE</b>                                                 | <b>idi</b>                              | <b>molR</b>                                  | <b>frsA</b>                      |
| <b>ilbL</b>                                                 | <b>intD</b>                             | <b>recG</b>                                  | <b>gudD</b>                      |
| <b>ilvD</b>                                                 | <b>mall</b>                             | <b>ruvA</b>                                  | <b>higB</b>                      |
| <b>metE</b>                                                 | <b>minC</b>                             | <b>STM0925</b>                               | <b>hupA</b>                      |
| <b>metR</b>                                                 | <b>molR</b>                             | <b>STM14_1198</b>                            | <b>IstR-1,2*</b>                 |

|                    |             |             |               |
|--------------------|-------------|-------------|---------------|
| <i>minC</i>        | <i>otsB</i> | STM2727     | <i>mutH</i>   |
| <i>molR</i>        | <i>polA</i> | <i>ybfE</i> | <i>ndh</i>    |
| <i>mug</i>         | <i>ptrA</i> | <i>yjiW</i> | <i>nlhH</i>   |
| <i>pcsA / dinD</i> | <i>ruvA</i> |             | <i>rcnB</i>   |
| <i>pshM</i>        | <i>ybbK</i> |             | <i>slyX</i>   |
| <i>rfaJ</i>        | <i>ybeR</i> |             | STM14_1432    |
| <i>rob</i>         | <i>ybeX</i> |             | STM14_1439    |
| <i>ruvAB</i>       | <i>ybjK</i> |             | STM14_2473    |
| <i>tyrS</i>        | <i>ydeQ</i> |             | STM14_3214    |
| <i>xylE</i>        | <i>ydfJ</i> |             | STM14_5518    |
| <i>yafL</i>        | <i>ydjF</i> |             | <i>thiM</i>   |
| <i>ybfE</i>        | <i>yebN</i> |             | <i>tisB</i> * |
| <i>ybiA</i>        | <i>yfaX</i> |             | <i>yacA</i>   |
| <i>ybiT</i>        | <i>ygck</i> |             | <i>yejK</i>   |
| <i>ycbU</i>        | <i>yjiW</i> |             | <i>yejL</i>   |
| <i>ycgJ</i>        | <i>ynaE</i> |             | <i>yhjE</i>   |
| <i>ycgL</i>        | <i>yoaC</i> |             | <i>yqaB</i>   |
| <i>yciG</i>        | <i>ysdA</i> |             |               |
| <i>ydbH</i>        |             |             |               |
| <i>ydeJ</i>        |             |             |               |
| <i>ydJjQ</i>       |             |             |               |
| <i>yecS</i>        |             |             |               |
| <i>yfiE</i>        |             |             |               |
| <i>yfiK</i>        |             |             |               |
| <i>ygiS</i>        |             |             |               |
| <i>yhiX</i>        |             |             |               |
| <i>yiaO</i>        |             |             |               |
| <i>yjgN</i>        |             |             |               |
| <i>yjiW</i>        |             |             |               |
| <i>ysdAB</i>       |             |             |               |

\* LexA-mediated control of *istR-1,2* and *tisB* was also described by Vogel et al (45).
