# Supplementary material for: Genome-Wide Identification and Expression Analysis of SOS Response Genes in Salmonella enterica Serovar Typhimurium
Source: MDPI journal article supplement (doi:10.3390/cells10040943), 2021-04-19
Supplement: s1 [file s1]

Genome-wide identification and expression analysis of SOS response genes in *Salmonella enterica* serovar Typhimurium  
 Ángela Mérida-Florian and Josep Casadesús

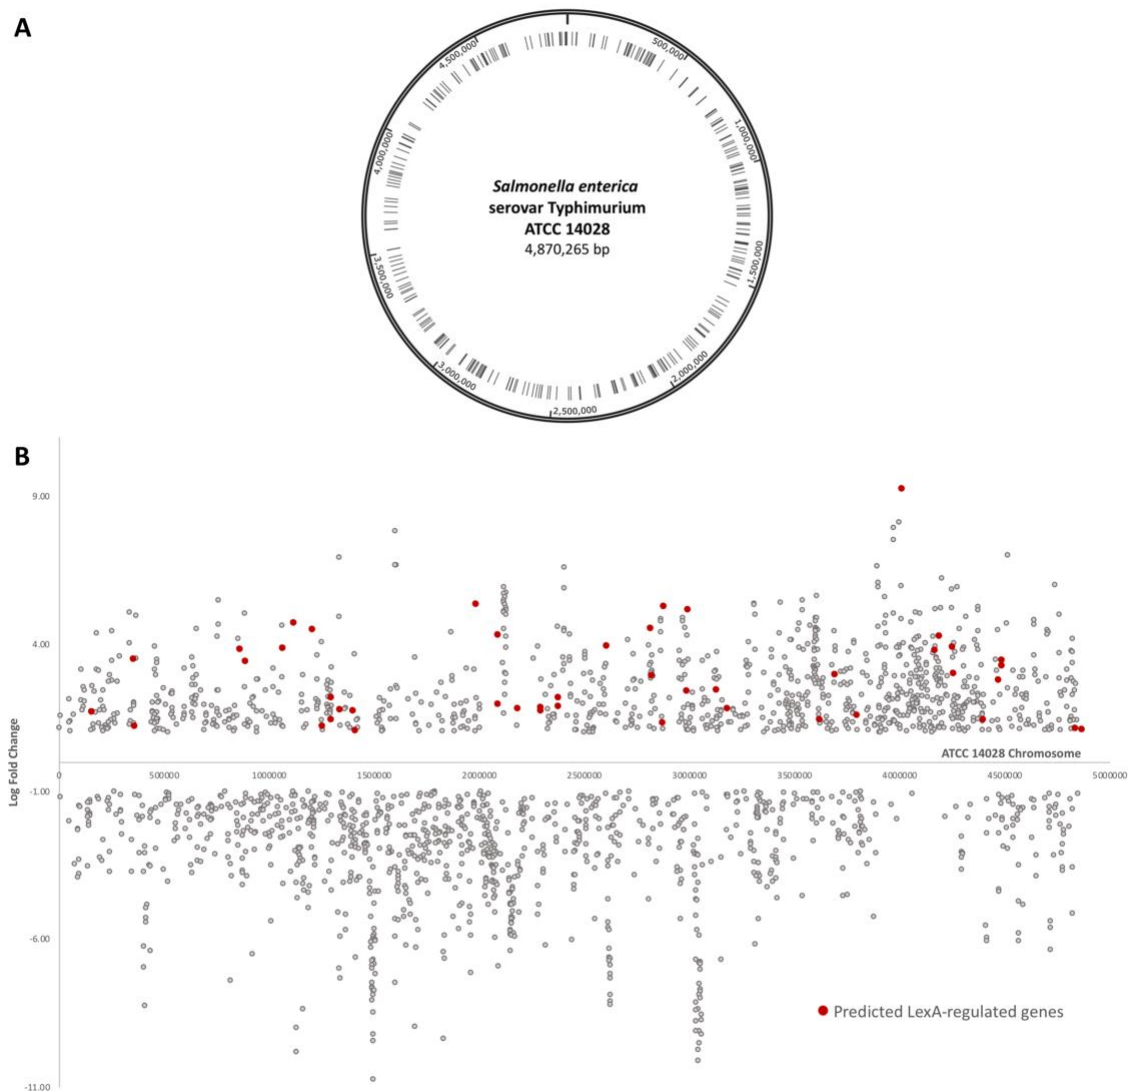

**Figure S1.** Identification of SOS response genes. **A.** Location of the 318 putative LexA boxes identified by bioinformatic analysis in the chromosome of *S. enterica* ATCC 14028. **B.** Chromosomal location of genes differentially expressed in the presence of 8,5 µg/ml of nalidixic acid. In red: genes upregulated by nalidixic acid that present a SOS box in their promoter region (listed in Table 1).
