# Supplementary material for: Genome-Wide Identification and Expression Analysis of SOS Response Genes in Salmonella enterica Serovar Typhimurium
Source: MDPI journal article supplement (doi:10.3390/cells10040943), 2021-04-19
Supplement: s1 [file s1]

**Table S3.** Oligonucleotides used in this study.

| Name                | Sequence (5' → 3')                                               |
|---------------------|------------------------------------------------------------------|
| yebG-GFP-F          | AAAGGACGCCGCGAGTAAACGAAAAAGCAAGCCGCCTGATAAGAAGGAGATATACATATGAG   |
| yebG-GFP-Km-R       | GAAAAGCATGGTACAAAACGCCGGGAGCGCAAGTGTGGGTTTCAGGCGTAGCACCAGGCG     |
| yebG-E1             | TACCTGCGCGCAGTATATAC                                             |
| yebG-E2             | CCTTAGCACAAATGATTCAGG                                            |
| sulA-E1             | ATAGAGTTGATCTTTCATCG                                             |
| sulA-E2             | CTTCTGACAAGCGTTCTCGC                                             |
| recA-P1             | GGCGACGACATACGCGCTACAAACCCTGTGGCAACAATTTGTGTAGGCTGGAGCTGCTTC     |
| recA-P2             | ATGGCGGCTTCGTTTTGCCCGCCCCACCATCACCTGATGACATATGAATATCCTCCTTAG     |
| recA-E1             | TGGAGAAGGGATTACGCGTC                                             |
| recA-E2             | TTACGCCGTAATTCCTGCTC                                             |
| recN-GFP-F          | TAATACGCTGGCAAACGCAAAAGAACTGCTGGCGGCGTAATAAGAAGGAGATATACATATGAG  |
| recN-GFP-Km-R       | GTTTTTGTGTGAACTCAGACCTTCGGGAGATAAAAAAGTTTCAGGCGTAGCACCAGGCG      |
| recN-E1             | AAGATGTGCTGATTCGCCGC                                             |
| recN-E2             | CAGTCAGCGTTTTACAGCGC                                             |
| sulA-GFP-F          | GCATTCCGGGCTAAAAATTCACTCTAATTTGTATCATTAAATAAGAAGGAGATATACATATGAG |
| sulA-GFP-Km-R       | GTTTCGCGTAAAAAAAAGTCCAGGATAAATCCTAATTTTACTTCAGGCGTAGCACCAGGCG    |
| STM13_3210-GFP-F    | GCAGGAAACGTGGGAAAGCGCTGACGACTGGTTTTATTAATAAGAAGGAGATATACATATGAG  |
| STM14_3210-GFP-Km-R | GCGGTATTCTGAAAAATGCGCGCCAGCATTAAAGCGCAATGTTTCAGGCGTAGCACCAGGCG   |
| STM14_3210-E1       | AGCCGAATGAAATTGCAGTC                                             |
| STM14_3210-E2       | GAAAGCTAAACACCACGCAG                                             |
| dinI-GFP-F          | GACCTGGGAGAGCGCTGATGACTGGTTCATCAATGAATAATAAGAAGGAGATATACATATGAG  |
| dinI-GFP-Km-R       | CGGGGCGACCCGGCAAACATACATCACTGCATATCATTTTTTCAGGCGTAGCACCAGGCG     |
| dinI-E1             | GATGAACAACAGATACCGGG                                             |
| dinI-E2             | TATGAACAATAAAGCGGCAG                                             |
| nIhH-GFP-F          | CTGGCGTGTTGTAAGTCCATCAACAGGCAAAATGACCTAATAAGAAGGAGATATACATATGAG  |

|                     |                                                                 |
|---------------------|-----------------------------------------------------------------|
| nlhH-GFP-Km-R       | CAACGTTATCCAGTTTTCAAGTTGAAAACAAAATTGAATTTTCAGGCGTAGCACCAGGCG    |
| nlhH-E1             | CCAGAATCATTATCCCCTCG                                            |
| nlhH-E2             | AACGGTTTTTCGGCTGATAAC                                           |
| STM14_1156-GFP-F    | GCAGGAAACGTGGGAAAGCGCTGACGACTGGTTTTATTAATAAGAAGGAGATATACATATGAG |
| STM14_1156-GFP-Km-R | GCGATATTCTGAAAAATGCGCGCCAGCATTAAAGCGCAATGTTTCAGGCGTAGCACCAGGCG  |
| STM14_1156-E1       | TTGAATGAATGTGAACCCGC                                            |
| STM14_1156-E2       | GATAGGACTCCCTCTGCCAC                                            |
| dinP-GFP-F          | CGACCCTCAACTGGAACGACAGTTGGTGTAGGGTTATAATAAGAAGGAGATATACATATGAG  |
| dinP-GFP-Km-R       | TGGCGCAATCGTAATAGTGATAAAATATTAATGGCCTGACTTCAGGCGTAGCACCAGGCG    |
| dinP-E1             | ACGTTTACAATTTTCCCGCC                                            |
| dinP-E2             | TGAGAATGAGAAAACGCGGG                                            |
| dinJ-GFP-F          | CAAAGATGCTGATGATTTGTTTGACCAGTTAGGGATCTGATAAGAAGGAGATATACATATGAG |
| dinJ-GFP-Km-R       | TGGAAGTGTCCCGAATATTCAATTTCCCTTTGCCCCATAGTTCAGGCGTAGCACCAGGCG    |
| dinJ-E1             | AGCATTGCAAGGCAAACATC                                            |
| dinJ-E2             | TGCCGACATCCTTATGACGC                                            |
| STM14_3214-GFP-F    | CCACTGGAACAGCCCGGATGCATGGAGGGATTTCTATGATAAGAAGGAGATATACATATGAG  |
| STM14_3214-GFP-Km-R | GCGCCATCCCGATTGTTTATTGCGCGGTAGAGTTCAGGTTTTTCAGGCGTAGCACCAGGCG   |
| STM14_3214-I1       | CTCGGAGCTGACCGGCATTC                                            |
| STM14_3214-E2       | GCTTCAGTTGCATGAACAGC                                            |
| umuC-GFP-F          | GTACACCACAAGATACTCTGATCTACTGCGTGTTAAGTAATAAGAAGGAGATATACATATGAG |
| umuC-GFP-Km-R       | GGGATGATTTGGCAACCATCTCAGGCATTGATCGCACAAGTTCAGGCGTAGCACCAGGCG    |
| umuC-E1             | ACTTCAATGTCTGTGCTGGAG                                           |
| umuC-E2             | ATACTCTTTTTATTTCATGCC                                           |
| STM14_1432-GFP-F    | CCTGAATAACACTGACTGGATTTACGGAGTGGAGCTATGATAAGAAGGAGATATACATATGAG |
| STM14_1432-GFP-Km-R | TGCTCACGGTCAAAATTAACCATCTGCGCAGCAATGTTTTTTCAGGCGTAGCACCAGGCG    |
| STM14_1432-E1       | GAACACCAACGGCTTTCTGG                                            |
| STM14_1432-E2       | CTGTTCCGGCATGTTGTTGG                                            |
| recA-GFP-F          | CGATAGCGAAGGCGTTGCAGAAACCAACGAAGATTTTTAATAAGAAGGAGATATACATATGAG |
| recA-GFP-Km-R       | ATGGCGGCTTCGTTTTGCCCGCCCCACCATCACCTGATGATTCAGGCGTAGCACCAGGCG    |
| yigN-GFP-F          | TTATCCCAATGATGAACGGGTGAAGCAGCAGTTAAGTTAATAAGAAGGAGATATACATATGAG |
| yigN-GFP-Km-R       | TTGCCCTACTCTGCGCCAGGACTAACTACTCCGTATGGGTTTCAGGCGTAGCACCAGGCG    |
| yigN-E1             | CCTCTCTTTTGCAAAGGCCG                                            |

|                   |                                                                 |
|-------------------|-----------------------------------------------------------------|
| yigN-E2           | CCACCATGTCAGCTTTCTGC                                            |
| uvrD-GFP-F        | ATGGCTGTTGCCGCGTATGCCAAGCTGGAAACGGTTTGATAAGAAGGAGATATACATATGAG  |
| uvrD-GFP-Km-R     | AGGCCGGATAAGACGCGCCATCCGGCACTATGAGAGTCGGTTCAGGCGTAGCACCAGGCG    |
| uvrD-I1           | GTATGAGCAAGAAAAAGGCG                                            |
| uvrD-E2           | GCCAGCAAAAATTTGCCGTC                                            |
| IstR-1,2-GFP-F    | CATTACGCTGTAAGAACCTCGCTTCGGCGAGGTTTTTTGTTAAGAAGGAGATATACATATGAG |
| IstR-1,2-GFP-Km-R | TCGCCGGGATTGATGATCACGCATTTTACAATGCCGGAAATTCAGGCGTAGCACCAGGCG    |
| IstR-1,2-E1       | CCCGTTTCAGCCAGGACTTC                                            |
| IstR-1,2-E2       | ACACGCTTTGAGTATAGGCG                                            |
| ssb-GFP-F         | CGAACCGCCAATGGATTTTGACGACGACATTCCGTTCTGATAAGAAGGAGATATACATATGAG |
| ssb-GFP-Km-R      | AGCGAAAATGCAAATAACGCTTTGAGTTTTTTACCAAAAATTCAGGCGTAGCACCAGGCG    |
| ssb-E1            | GTAGAGACTCGGATGCCTGG                                            |
| ssb-E2            | CACCAGGCATTTTCAGCAGAC                                           |
| polB-GFP-F        | TTTTGCTACACTACTGACCGGGCAACTGGGGTTATTTTGATAAGAAGGAGATATACATATGAG |
| polB-GFP-Km-R     | AGGGCGCTATGGTACTGGAAGGCGGCGCTTTCGTCACGCGTTCAGGCGTAGCACCAGGCG    |
| polB-I1           | GGAAATCGGGCACAGGCTGG                                            |
| polB-E2           | GCTTTCTGTATCGCTGATCC                                            |
| ruvA-GFP-F        | TGAAACACTGATTCGCGACGCGTTACGCGCCGCGTTATGATAAGAAGGAGATATACATATGAG |
| ruvA-GFP-Km-R     | CCTGCTGAAATCAGGCGATCTGCTTCTATCATCCTTTACCTTCAGGCGTAGCACCAGGCG    |
| ruvA-E1           | ACCGATTCTGAAGGGAAGGCC                                           |
| ruvA-E2           | AGAGTCGTTTTACCTAACCC                                            |
| uvrB-GFP-F        | GTTGCACCAGTTACGCGAGTTGTTTATCGCGGCGTCCTGATAAGAAGGAGATATACATATGAG |
| uvrB-GFP-Km-R     | GAGCCATGGTAACGATGACTCGCTGGCGATCGACACATTGTTTCAGGCGTAGCACCAGGCG   |
| uvrB-E1           | GATAACCAGCACACTGCTGG                                            |
| uvrB-E2           | CGTTAGTCAAAGCCTGTCAC                                            |
| sbmC-GFP-F        | CTGGGATATTGAAATGTATATTCCGGTACAGCGGAAGTGATAAGAAGGAGATATGAG       |
| sbmC-GFP-Km-R     | ACATTATCCGTCCGCTCTTTTCAGCCAGGAAACCAGTCGATTTCAGGCGTAGCACCAGGCG   |
| sbmC-E1           | ACAAAATGATCACGCTGTCC                                            |
| sbmC-E2           | TTGCGCTCCTTACGGGAATG                                            |
| msgA-GFP-F        | GATGTTTGAAGAGGCTGATATGTGGCTGGTCGCCGAATAATAAGAAGGAGATATACATATGAG |
| msgA-GFP-Km-R     | CTGTTTTCGATCGGACATGTCGCTTTCGCAGGAGGGGACGTTTCAGGCGTAGCACCAGGCG   |
| msgA-E1           | AACGTCAGGATGACAAAACG                                            |

|                     |                                                                                                |
|---------------------|------------------------------------------------------------------------------------------------|
| msgA-E2             | GAATGTCGGTTCACATACC                                                                            |
| uvrA-GFP-F          | GTCGCATACCGCCCGCTTCCTTAAACCTATGCTCAAATAATAAGAAGGAGATATACATATGAG                                |
| uvrA-GFP-Km-R       | ATGATGCCGCTTCCCGGCGAATCGGAAAGCGGCGTGAAGGTTTCAGGCGTAGCACCAGGCG                                  |
| uvrA-I1             | GTGCCGGAGTCTCGCTCGCG                                                                           |
| uvrA-E2             | GCGCTAAAGCGGTCAGGCAG                                                                           |
| yqaB-GFP-F          | GGCGGCGGGAATGGATGCCGTGGATGTCCGACTATTGTGATAAGAAGGAGATATACATATGAG                                |
| yqaB-GFP-Km-R       | AAACTACTGGCAAACAGAGACAGGAGCGACAGTCCGTCACCTTCAGGCGTAGCACCAGGCG                                  |
| yqaB-E1             | CTGCCCTGCAATCGCTTTTC                                                                           |
| yqaB-E2             | CCCCTCCAAGGCTATTACCC                                                                           |
| yejL-GFP-F          | CGCCTTGCACTCTTCGATTAGCGAAGACAACGCGCACTAATAAGAAGGAGATATACATATGAG                                |
| yejL-GFP-Km-R       | AGTTACCATACCTGTCGCTTGTTTCTCCGGAGTCGGCTTTTTTCAGGCGTAGCACCAGGCG                                  |
| yejL-E1             | GTCATTTTCAGGCGTTATCCG                                                                          |
| yejL-E2             | TTGAACAGAGCGAACCAGTG                                                                           |
| corE-GFP-F          | CTATTTTGGTAGCCGCATATTACAGCAATTTGTAAGCTAATAAGAAGGAGATATACATATGAG                                |
| corE-GFP-Km-R       | GGTGGTGGAGATGTGTTCCAGGGGAACTCCTTTAAAGCTTCAGGCGTAGCACCAGGCG                                     |
| corE-E1             | CAAACATTGTCTCTCGCCTG                                                                           |
| corE-E2             | AAATAGGCCGAGATGACCAC                                                                           |
| lexA-GFP-F          | GCTGGCGGTAGGCGTCATTCGCAACGGGGAATGGTTGTAGTAAGAAGGAGATATACATATGAG                                |
| lexA-GFP-Km-R       | CGATTGCCGGATGGCGGCTTACAAGGAGATTAAAAAGAGATTCAGGCGTAGCACCAGGCG                                   |
| lexA-E1             | ACATTTTCGATAAAGGTTCC                                                                           |
| lexA-E2             | CTGATAAGCGCAGCGCCATC                                                                           |
| $\Delta$ recA-GFP-F | ACTATCCGGTTCAATACCAAGTTGCATGACAGGAGTAATATAAGAAGGAGATATACATATGAG                                |
| SNP-14028-W85       | CCGCCATTTTGCAGCCCCTTATTTACCTGTGTTTATATACACTGGCCGTCGTTTTACAAC                                   |
| SNP-474-W85         | CCGCCATTTTGCAGCCCCTTATTTAGCTGTGTTTATATACACTGGCCGTCGTTTTACAAC                                   |
| SNP-W86             | TTTCGAATAAATTGCTTTTCTTGCTGCCTTGCAATATACTTCGGTCATTGGCATGTTCAA                                   |
| SNP-yebG-14028      | GTATTTAACTTCAACCGCCATTTTGCAGCCCCTTATTTAGCTGTGTTTATATACAGTATATTGCAAGGCAGCAAGAA<br>AAGCAATTTATTC |
| SNP-yebG-474        | GTATTTAACTTCAACCGCCATTTTGCAGCCCCTTATTTACCTGTGTTTATATACAGTATATTGCAAGGCAGCAAGAA<br>AAGCAATTTATTC |
