# Supplementary material for: Genome-Wide Identification and Expression Analysis of SOS Response Genes in Salmonella enterica Serovar Typhimurium
Source: MDPI journal article supplement (doi:10.3390/cells10040943), 2021-04-19
Supplement: s1 [file s1]

**Table S2.** Strains used in this study.

| Strain              | Genotype                                      |
|---------------------|-----------------------------------------------|
| ATCC 14028          | Wild type                                     |
| ST4/74              | Wild type                                     |
| SV4231 <sup>b</sup> | <i>recF522::Tn5</i>                           |
| SV4212 <sup>b</sup> | <i>recD543::Tn10</i>                          |
| SV10037/42          | 14028 [SNP4/74]- <i>yebG::gfp</i>             |
| SV10043/44          | 4/74 [SNP14028]- <i>yebG::gfp</i>             |
| SV9012              | <i>yebG::gfp</i>                              |
| SV9063              | <i>yebG::gfp lexA(Ind<sup>-</sup>)</i>        |
| SV9407              | <i>umuC::gfp</i>                              |
| SV9408              | <i>uvrD::gfp</i>                              |
| SV9409              | <i>ruvA::gfp</i>                              |
| SV9410              | <i>recA::gfp</i>                              |
| SV9453              | <i>recN::gfp</i>                              |
| SV9454              | STM14_3210:: <i>gfp</i>                       |
| SV9455              | STM14_1156:: <i>gfp</i>                       |
| SV9462              | <i>dinI::gfp</i>                              |
| SV9463              | <i>yigN::gfp</i>                              |
| SV9464              | <i>dinP::gfp</i>                              |
| SV9465              | <i>nlhH::gfp</i>                              |
| SV9467              | <i>recA::gfp lexA(Ind<sup>-</sup>)</i>        |
| SV9468              | <i>uvrD::gfp lexA(Ind<sup>-</sup>)</i>        |
| SV9469              | <i>umuC::gfp lexA(Ind<sup>-</sup>)</i>        |
| SV9470              | <i>ruvA::gfp lexA(Ind<sup>-</sup>)</i>        |
| SV9471              | <i>recN::gfp lexA(Ind<sup>-</sup>)</i>        |
| SV9472              | <i>dinI::gfp lexA(Ind<sup>-</sup>)</i>        |
| SV9473              | <i>yigN::gfp lexA(Ind<sup>-</sup>)</i>        |
| SV9474              | <i>dinP::gfp lexA(Ind<sup>-</sup>)</i>        |
| SV9475              | STM14_3210:: <i>gfp lexA(Ind<sup>-</sup>)</i> |
| SV9476              | <i>nlhH::gfp lexA(Ind<sup>-</sup>)</i>        |
| SV9477              | STM14_1156:: <i>gfp lexA(Ind<sup>-</sup>)</i> |
| SV9479              | <i>sulA::gfp</i>                              |
| SV9480              | <i>sulA::gfp lexA(Ind<sup>-</sup>)</i>        |
| SV9546              | STM14_1156:: <i>gfp ΔrecA::Cm</i>             |
| SV9618              | <i>ΔrecA::Cm</i>                              |
| SV9635              | <i>yebG::gfp ΔrecA::Cm</i>                    |
| SV9636              | <i>sulA::gfp ΔrecA::Cm</i>                    |
| SV9637              | <i>dinI::gfp ΔrecA::Cm</i>                    |

|        |                                              |
|--------|----------------------------------------------|
| SV9638 | <i>uvrD::gfp ΔrecA::Cm</i>                   |
| SV9639 | <i>STM14_3210::gfp ΔrecA::Cm</i>             |
| SV9671 | <i>ssb::gfp</i>                              |
| SV9673 | <i>STM14_3214::gfp</i>                       |
| SV9674 | <i>lexA::gfp</i>                             |
| SV9675 | <i>IstR-1,2::gfp</i>                         |
| SV9676 | <i>polB::gfp</i>                             |
| SV9677 | <i>yqaB::gfp</i>                             |
| SV9678 | <i>uvrA::gfp</i>                             |
| SV9679 | <i>lexA::gfp ΔrecA::Cm</i>                   |
| SV9680 | <i>IstR-1,2::gfp lexA(Ind<sup>-</sup>)</i>   |
| SV9681 | <i>polB::gfp lexA(Ind<sup>-</sup>)</i>       |
| SV9682 | <i>yqaB::gfp lexA(Ind<sup>-</sup>)</i>       |
| SV9683 | <i>uvrA::gfp lexA(Ind<sup>-</sup>)</i>       |
| SV9685 | <i>ssb::gfp lexA(Ind<sup>-</sup>)</i>        |
| SV9687 | <i>STM14_3214::gfp lexA(Ind<sup>-</sup>)</i> |
| SV9697 | <i>yejL::gfp</i>                             |
| SV9698 | <i>yejL::gfp lexA(Ind<sup>-</sup>)</i>       |
| SV9708 | <i>msgA::gfp</i>                             |
| SV9709 | <i>msgA::gfp lexA(Ind<sup>-</sup>)</i>       |
| SV9710 | <i>corE::gfp</i>                             |
| SV9711 | <i>corE::gfp lexA(Ind<sup>-</sup>)</i>       |
| SV9712 | <i>sbmC::gfp</i>                             |
| SV9713 | <i>sbmC::gfp lexA(Ind<sup>-</sup>)</i>       |
| SV9719 | <i>uvrB::gfp</i>                             |
| SV9722 | <i>STM14_1432::gfp</i>                       |
| SV9725 | <i>uvrB::gfp lexA(Ind<sup>-</sup>)</i>       |
| SV9728 | <i>STM14_1432::gfp lexA(Ind<sup>-</sup>)</i> |
| SV9731 | <i>ST4/74 yebG::gfp</i>                      |
| SV9733 | <i>yqaB::gfp ΔrecA::Cm</i>                   |
| SV9736 | <i>msgA::gfp ΔrecA::Cm</i>                   |
| SV9737 | <i>yejL::gfp ΔrecA::Cm</i>                   |
| SV9738 | <i>STM14_3214::gfp ΔrecA::Cm</i>             |
| SV9740 | <i>ssb::gfp ΔrecA::Cm</i>                    |
| SV9741 | <i>IstR-1,2::gfp ΔrecA::Cm</i>               |
| SV9742 | <i>nlhH::gfp ΔrecA::Cm</i>                   |
| SV9743 | <i>polB::gfp ΔrecA::Cm</i>                   |
| SV9747 | <i>sbmC::gfp ΔrecA::Cm</i>                   |
| SV9748 | <i>ruvA::gfp ΔrecA::Cm</i>                   |
| SV9749 | <i>umuC::gfp ΔrecA::Cm</i>                   |
| SV9750 | <i>uvrA::gfp ΔrecA::Cm</i>                   |
| SV9752 | <i>uvrB::gfp ΔrecA::Cm</i>                   |
| SV9753 | <i>corE::gfp ΔrecA::Cm</i>                   |
| SV9754 | <i>dinP::gfp ΔrecA::Cm</i>                   |

|              |                                  |
|--------------|----------------------------------|
| SV9755       | <i>yigN::gfp ΔrecA::Cm</i>       |
| SV9756       | <i>recN::gfp ΔrecA::Cm</i>       |
| SV9757       | <i>STM14_1432::gfp ΔrecA::Cm</i> |
| SV10122      | <i>sulA::gfp ΔrecF522::Tn5</i>   |
| SV10037/42   | [SNP4/74]- <i>yebG::gfp</i>      |
| SV10043/44 c | [SNP14028]- <i>yebG::gfp</i>     |
| SV10123      | <i>sulA::gfp ΔrecD543::Tn10</i>  |

<sup>a</sup> Allele originally described by Bunny et al. 2002 [18]

<sup>b</sup> Alleles originally described by Cano et al. 2002 [20]

<sup>c</sup> 4/74 derivative
