# Supplementary material for: Genome-Wide Identification and Expression Analysis of SOS Response Genes in Salmonella enterica Serovar Typhimurium
Source: MDPI journal article supplement (doi:10.3390/cells10040943), 2021-04-19
Supplement: s1 [file s1]

Genome-wide identification and expression analysis of SOS response genes in *Salmonella enterica* serovar Typhimurium  
Ángela Mérida-Florian and Josep Casadesús

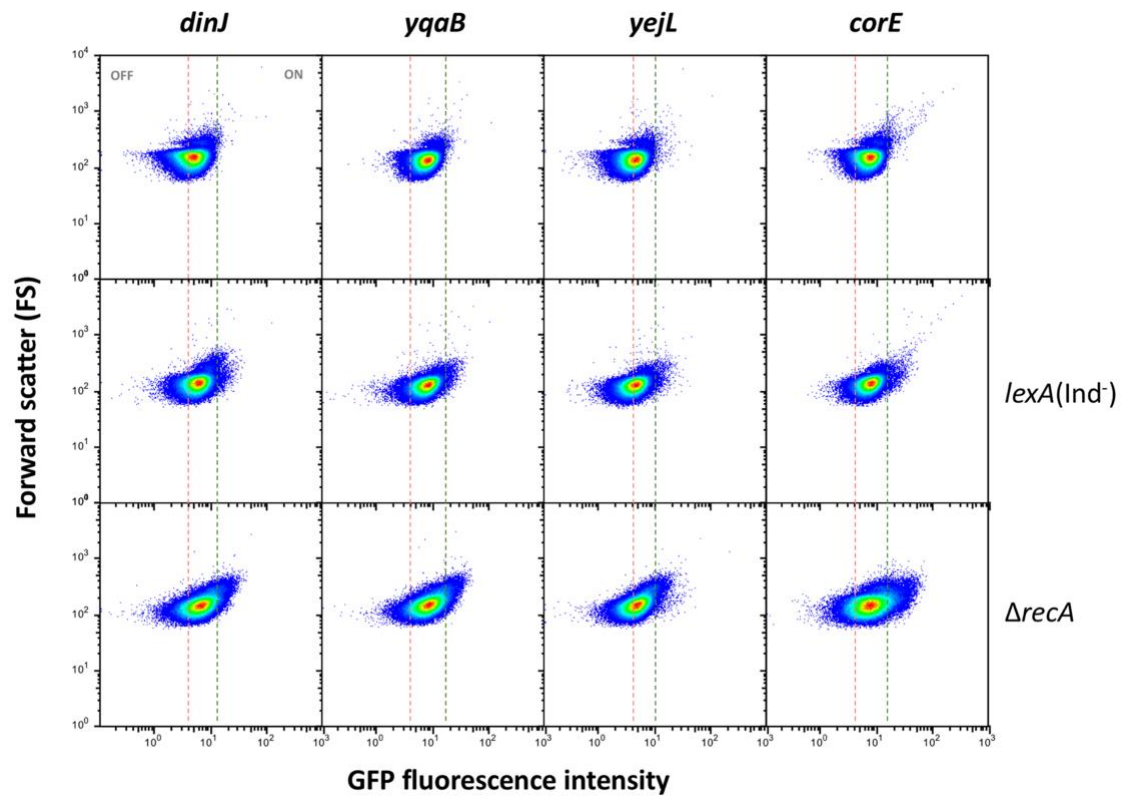

**Figure S3.** Expression patterns of miscellaneous loci. The expression of genes in this group is heterogeneous but a common trait is the presence of a subpopulation that only appears in a *LexA(Ind<sup>-</sup>)* background.
