# Supplementary figures and images for: Genome-Wide Identification and Expression Analysis of SOS Response Genes in Salmonella enterica Serovar Typhimurium
Source: MDPI journal article supplement (doi:10.3390/cells10040943), 2021-04-19

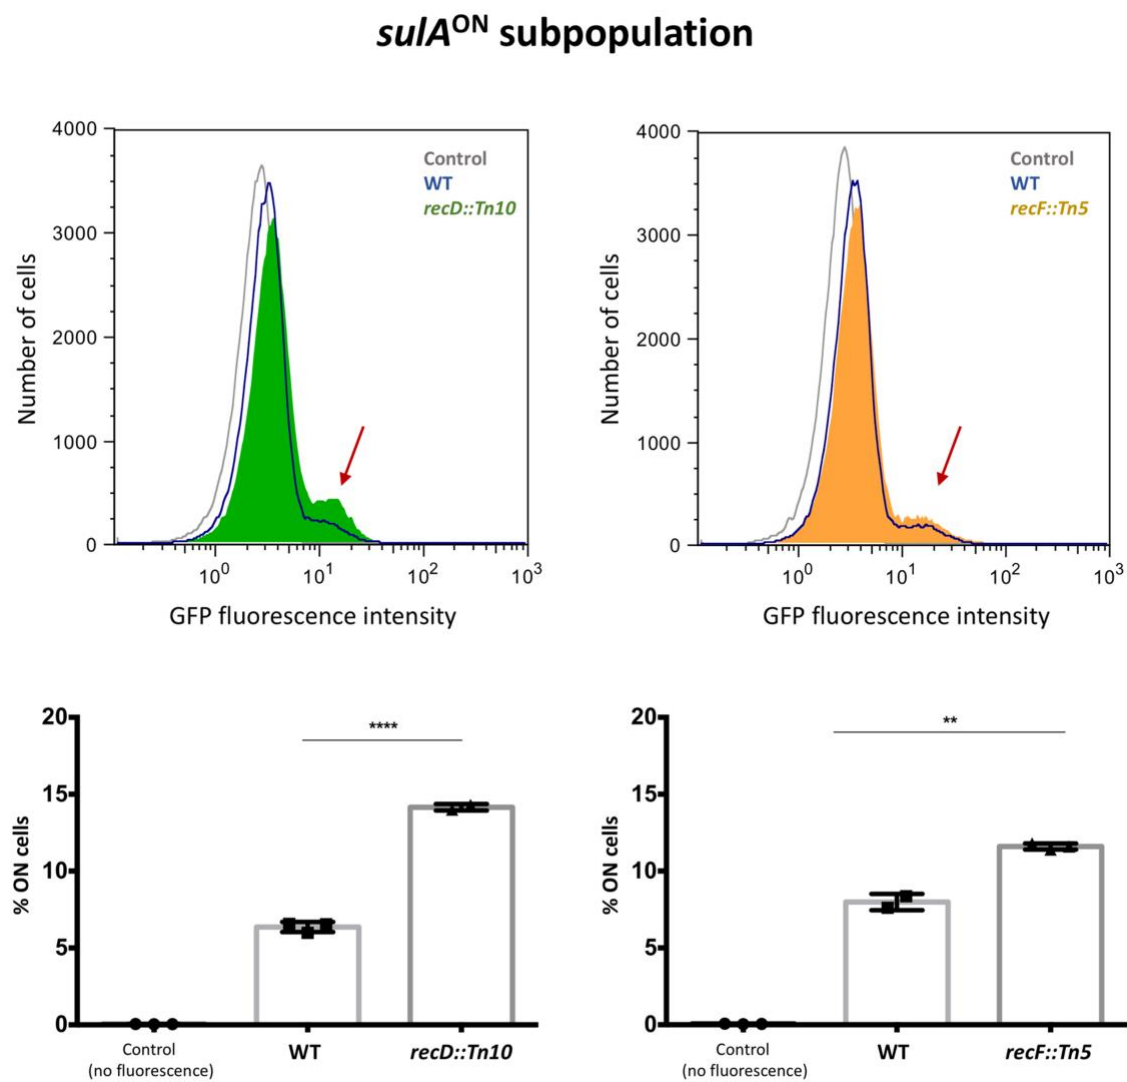

**Figure S2.** Sizes of the *SulA*<sup>ON</sup> subpopulation in *recD* and *recF* backgrounds.

Supplement: s1 [file s1]
